# Supplementary material
Source: PubMed Central journal article supplement (PMC4064112)
Supplement: NIHMS578779-supplement-02.pdf [file NIHMS578779-supplement-02.pdf]

**Table 1: Primer pairs sequences (Related to Fig. 1 and Fig. 4)**

| <b>Gene</b>                     | <b>Primer</b>  | <b>Sequence</b>                |
|---------------------------------|----------------|--------------------------------|
| <b>grb10</b>                    | Forward primer | 5'-CGAAACTCACCCGTCCAG-3'       |
|                                 | Reverse primer | 5'-GGATTCACAGTGTTCGGTTGG-3'    |
| <b>fas</b>                      | Forward primer | 5'-TCGTCTATACCACTGCTTACTAC-3'  |
|                                 | Reverse primer | 5'-ACACCACCTGAACCTGAG-3'       |
| <b>acc</b>                      | Forward primer | 5'-TGCCACCACCTTATCACTATGTA-3'  |
|                                 | Reverse primer | 5'-CCTGCCTGTCTCCATCCA-3'       |
| <b>hsl</b>                      | Forward primer | 5'-TGTGTCAGTGCCTATTCAG-3'      |
|                                 | Reverse primer | 5'-GAACAGCGAAGTGTCTCT-3'       |
| <b>atgl</b>                     | Forward primer | 5'-GCTGTGGAATGAGGACATAGGA-3'   |
|                                 | Reverse primer | 5'-GCATAGTGAGTGGCTGGTGAA-3'    |
| <b>ucp1</b>                     | Forward primer | 5'-AAGACAGAAGAGCATAGCATTAC-3'  |
|                                 | Reverse primer | 5'-CCAGTCATACACTCCCACCTC-3'    |
| <b>pgc1-<math>\alpha</math></b> | Forward primer | 5'-CCGAAGACACTACAGGTTCCATAG-3' |
|                                 | Reverse primer | 5'-GGGAGGGAGAGAGGAGAGAGG-3'    |
| <b>prdm16</b>                   | Forward primer | 5'-TGAGGAAGCATTGAAGTTAAAG-3'   |
|                                 | Reverse primer | 5'-GTTCTTAGCCTGCCTGTAC-3'      |
| <b>ppar-<math>\gamma</math></b> | Forward primer | 5'-TGTGGACCTCTCCGTGATGG-3'     |
|                                 | Reverse primer | 5'-GGTTCTACTTTGATCGCACTTTGG-3' |
| <b><math>\beta</math>-actin</b> | Forward primer | 5'-GTTGGTTGGAGCAAACATC-3'      |
|                                 | Reverse primer | 5'-CTTATTTTCATGGATACTTGAATG-3' |

## Supplemental Reference

- Ahmadian, M., Abbott, M.J., Tang, T., Hudak, C.S., Kim, Y., Bruss, M., Hellerstein, M.K., Lee, H.Y., Samuel, V.T., Shulman, G.I., Wang, Y., Duncan, R.E., Kang, C., and Sul, H.S. (2011). Desnutrin/ATGL is regulated by AMPK and is required for a brown adipose phenotype. *Cell metabolism* 13, 739-748.
- Langlais, P., Dong, L.Q., Ramos, F.J., Hu, D., Li, Y., Quon, M.J., and Liu, F. (2004). Negative Regulation of Insulin-Stimulated MAP Kinase Signaling By Grb10. *Mol. Endocrinol.* 18, 350-358.
- Liu, M., Xiang, R., Wilk, S.A., Zhang, N., Sloane, L.B., Azarnoush, K., Zhou, L., Chen, H., Xiang, G., Walter, C.A., Austad, S.N., Musi, N., DeFronzo, R.A., Asmis, R., Scherer, P.E., Dong, L.Q., and Liu, F. (2012). Fat-specific DsbA-L overexpression promotes adiponectin multimerization and protects mice from diet-induced obesity and insulin resistance. *Diabetes* 61, 2776-2786.
- Mancuso, D.J., Sims, H.F., Yang, K., Kiebish, M.A., Su, X., Jenkins, C.M., Guan, S., Moon, S.H., Pietka, T., Nassir, F., Schappe, T., Moore, K., Han, X., Abumrad, N.A., and Gross, R.W. (2010). Genetic ablation of calcium-independent phospholipase A2gamma prevents obesity and insulin resistance during high fat feeding by mitochondrial uncoupling and increased adipocyte fatty acid oxidation. *The Journal of biological chemistry* 285, 36495-36510.
- Mul, J.D., O'Duibhir, E., Shrestha, Y.B., Koppen, A., Vargovic, P., Toonen, P.W., Zarebidaki, E., Kvetnansky, R., Kalkhoven, E., Cuppen, E., and Bartness, T.J. (2013). Pmch-deficiency in rats is associated with normal adipocyte differentiation and lower sympathetic adipose drive. *PloS one* 8, e60214.
- Ramos, F.J., Langlais, P.R., Hu, D., Dong, L.Q., and Liu, F. (2006). Grb10 mediates insulin-stimulated degradation of the insulin receptor: a mechanism of negative regulation. *American journal of physiology. Endocrinology and metabolism* 290, E1262-E1266.
- Uldry, M., Yang, W., St-Pierre, J., Lin, J., Seale, P., and Spiegelman, B.M. (2006). Complementary action of the PGC-1 coactivators in mitochondrial biogenesis and brown fat differentiation. *Cell metabolism* 3, 333-341.
- Wang, L., Balas, B., Christ-Roberts, C.Y., Kim, R.Y., Ramos, F.J., Kikani, C.K., Li, C., Deng, C., Reyna, S., Musi, N., Dong, L.Q., DeFronzo, R.A., and Liu, F. (2007). Peripheral disruption of the Grb10 gene enhances insulin signaling and sensitivity in vivo. *Molecular and cellular biology* 27, 6497-6505.
